# Supplementary material
Source: publisher figshare collection journal article supplement (https://frontiersin.figshare.com/ndownloader/files/35108725)
Supplement: Supplementary file [file 35108725]

| Traditional RNA-Seq | Hela cell lines     |
|---------------------|---------------------|
| Raw reads           | 48,688,532          |
| Processed @ phred25 | 48,599,461 (99.82%) |

| itd-MDA-NGS         | Hela cell lines     |
|---------------------|---------------------|
| Raw reads           | 29,834,900          |
| Processed @ phred25 | 28,803,581 (96.54%) |
